# Supplementary material for: Effects of Magnesium, Calcium, and Aluminum Chelation on Fluoroquinolone Absorption Rate and Bioavailability: A Computational Study
Source: MDPI journal article supplement (doi:10.3390/pharmaceutics13050594), 2021-04-21
Supplement: s1 [file s1]

# Supplementary Materials: Effects of Magnesium, Calcium, and Aluminum Chelation on Fluoroquinolone Absorption Rate and Bioavailability: A Computational Study

Daniel M. Walden, Maksim Khotimchenko, Hypatia Hou, Kaushik Chakravarty and Jyotika Varshney

**Table 1.** Fluoroquinolone pharmacokinetic parameters upon coadministration with antacids and drug products containing multivalent metals.

| Fluoroquinolone | Dose Regimen                                      | $C_{max}$ (µg/mL) | $T_{max}$ (h) | $t_{1/2}$ (h) | AUC (µg h mL <sup>-1</sup> ) | $t_{1/2}$ calc. (h) | $k_e$ calc. (h <sup>-1</sup> ) | $k_a$ calc. (h <sup>-1</sup> ) | Reference |
|-----------------|---------------------------------------------------|-------------------|---------------|---------------|------------------------------|---------------------|--------------------------------|--------------------------------|-----------|
| Ciprofloxacin   | 750 mg                                            | 3.18              | 1.24          | 3.9           | 13.5                         | 3.9                 | 0.18                           | 2.21                           | [9]       |
|                 | 750 mg 5 mins after 3 x 600 mg aluminum hydroxide | 0.6               | 1.61          | 6.5           | 2.08                         | 6.5                 | 0.11                           | 1.89                           |           |
|                 | 200 mg ciprofloxacin                              | 1.30              | 1.30          | 2.40          | 6.40                         | 2.40                | 0.29                           | 1.61                           | [10]      |
|                 | 200 mg concurrent with 1 g aluminum hydroxide     | 0.20              | 2.10          | 2.00          | 0.80                         | 2.00                | 0.35                           | 0.63                           |           |
|                 | 500 mg                                            | 2.0               | 1.4           | -             | 8.8                          | 4.42                | 0.16                           | 1.96                           | [11]      |
|                 | 500 mg concurrent with 1 g sucralfate             | 0.2               | 1.3           | -             | 1.1                          | N/A                 | N/A                            | N/A                            |           |
|                 | 750 mg                                            | 3.42              | 1.25          | 3.83          | 16.07                        | 3.83                | 0.18                           | 2.17                           | [12]      |
|                 | 750 mg 5-10 mins after 30 mL Maalox               | 0.68              | 0.66          | 4.48          | 2.42                         | 4.48                | 0.15                           | 5.59                           |           |
|                 | 750 mg                                            | 3.38              | 1.56          | 4.29          | 15.5                         | N/A                 | 0.16                           | 1.65                           | [15]      |
|                 | 750 mg concurrent with didanosine                 | 0.25              | 0.75          | -             | 0.26                         | 1.13                | 0.62                           | 2.47                           |           |
| Enoxacin        | 500 mg                                            | 2.9               | -             | -             | 12.4                         | 3.53                | 0.20                           | 2.90                           | [16]      |
|                 | 500 mg concurrent with 500 mg calcium             | 1.8               | -             | -             | 7.3                          | 4.06                | 0.17                           | 3.08                           |           |
|                 | 200 mg                                            | 2.30              | 0.80          | 3.90          | 11.40                        | N/A                 | 0.18                           | 4.10                           | [10]      |
|                 | 200 mg concurrent with 1 g aluminum hydroxide     | 0.50              | 1.60          | -             | 1.80                         | N/A                 | N/A                            | N/A                            |           |
| Fleroxacin      | 400 mg                                            | 3.17              | 1.00          | 3.78          | 14.50                        | N/A                 | 0.18                           | 2.97                           | [17]      |
|                 | 400 mg concurrent with 30 mL Maalox               | 0.95              | 1.50          | 2.86          | 3.89                         | N/A                 | 0.24                           | 1.42                           |           |
|                 | 200 mg                                            | 2.40              | 0.80          | 10.90         | 32.60                        | 10.90               | 0.06                           | 5.68                           | [10]      |
|                 | 200 mg concurrent with 1 g aluminum hydroxide     | 1.80              | 1.30          | 10.20         | 27.00                        | N/A                 | 0.07                           | 2.98                           |           |
| Lomefloxacin    | 400 mg                                            | 5.30              | 1.70          | -             | 70.30                        | 10.15               | 0.07                           | 2.08                           | [18]      |
|                 | 400 mg concurrent with 1 g sucralfate             | 3.90              | 2.50          | -             | 53.40                        | 10.54               | 0.07                           | 1.24                           |           |
|                 | 200 mg                                            | 2.20              | 1.10          | 3.90          | 13.50                        | N/A                 | 0.18                           | 2.63                           | [10]      |
|                 | 200 mg concurrent with 1 g aluminum hydroxide     | 1.00              | 2.00          | 4.60          | 8.80                         | N/A                 | 0.15                           | 1.18                           |           |
| Norfloxacin     | 200 mg                                            | 1.91              | 1.60          | 6.83          | 12.64                        | N/A                 | 0.10                           | 1.95                           | [20]      |
|                 | 200 mg concurrent with 2 g Kolantyl               | 1.03              | 1.40          | 7.67          | 7.48                         | N/A                 | 0.09                           | 2.45                           |           |
|                 | 200 mg                                            | 1.50              | 1.20          | 2.90          | 6.70                         | N/A                 | 0.24                           | 2.02                           | [10]      |
|                 | 200 mg concurrent with 1 g aluminum hydroxide     | 0.10              | -             | -             | 0.20                         | N/A                 | N/A                            | N/A                            |           |
|                 | 400 mg                                            | 1.29              | 1.60          | -             | 7.39                         | 5.78                | 0.12                           | 1.82                           | [21]      |
|                 | 400 mg concurrent with 1 g sucralfate             | 0.10              | 1.80          | -             | 0.64                         | 4.63                | 0.15                           | 1.39                           |           |

|              |                                                                                |      |      |       |        |      |      |      |      |
|--------------|--------------------------------------------------------------------------------|------|------|-------|--------|------|------|------|------|
|              | 400 mg                                                                         | 1.64 | 1.25 | -     | 6.69   | 3.91 | 0.18 | 2.19 |      |
|              | 400 mg 5 mins after 30 mL Maalox                                               | 0.08 | 1.56 | -     | -      | 7.14 | 0.10 | 2.05 | [24] |
|              | 400 mg 5 mins after 30 mL calcium carbonate                                    | 0.56 | 2.77 | -     | 2.50   | 2.34 | 0.30 | 0.43 |      |
| Ofloxacin    | 200 mg                                                                         | 3.20 | 1.10 | 5.10  | 23.80  | N/A  | 0.14 | 2.93 | [10] |
|              | 200 mg concurrent with 1 g aluminum hydroxide                                  | 1.30 | 2.40 | 6.00  | 12.40  | N/A  | 0.12 | 1.03 |      |
|              | 400 mg                                                                         | 3.05 | 1.60 | -     | 29.50  | 4.63 | 0.15 | 1.65 | [21] |
|              | 400 mg concurrent with 1 g sucralfate                                          | 0.93 | 2.90 | -     | 11.50  | 7.95 | 0.09 | 0.89 |      |
| Pefloxacin   | 400 mg                                                                         | 5.10 | 1.05 | 10.60 | 56.50  | N/A  | 0.07 | 3.98 | [71] |
|              | 400 mg concurrent with 30 mL Maalox                                            | 2.00 | 1.95 | 9.60  | 25.80  | N/A  | 0.07 | 1.69 |      |
| Rufloxacin   | 400 mg                                                                         | 3.74 | 2.50 | 39.00 | 178.00 | N/A  | 0.02 | 1.88 | [72] |
|              | 400 mg 5 mins after 30 mL Maalox                                               | 3.97 | 3.50 | 40.80 | 151.00 | N/A  | 0.02 | 1.24 |      |
| Levofloxacin | 100 mg                                                                         | 1.80 | 0.80 | 6.40  | 9.30   | N/A  | 0.11 | 4.86 | [10] |
|              | 100 mg concurrent with 1 g aluminum hydroxide                                  | 0.60 | 1.50 | 7.10  | 5.10   | N/A  | 0.10 | 2.16 |      |
| Sparfloxacin | 200 mg                                                                         | 0.90 | 5.30 | 14.70 | 21.10  | N/A  | 0.05 | 0.49 |      |
|              | 200 mg concurrent with 1 g aluminum hydroxide                                  | 0.70 | 4.00 | 14.00 | 13.70  | N/A  | 0.05 | 0.72 |      |
| Tosufloxacin | 150 mg                                                                         | 0.30 | 1.30 | 3.30  | 2.40   | N/A  | 0.21 | 1.91 |      |
|              | 150 mg concurrent with 1 g aluminum hydroxide                                  | 0.10 | 3.50 | 6.90  | 0.70   | N/A  | 0.10 | 0.62 |      |
| Gatifloxacin | 400 mg                                                                         | 3.80 | 1.40 | 8.60  | 33.50  | N/A  | 0.08 | 2.55 | [73] |
|              | 400 mg concurrent with 600 mg magnesium hydroxide/900 mg of aluminum hydroxide | 1.20 | 1.60 | 9.50  | 11.90  | N/A  | 0.07 | 2.20 |      |
| Moxifloxacin | 400 mg                                                                         | 2.83 | 1.00 | 12.90 | 32.20  | N/A  | 0.05 | 4.48 | [74] |
|              | 400 mg 5 mins after 1 g sucralfate                                             | 0.58 | 3.50 | 13.90 | 12.90  | N/A  | 0.05 | 0.87 |      |
|              | 400 mg                                                                         | 2.71 | 0.88 | 13.20 | 33.00  | N/A  | 0.05 | 5.30 | [75] |
|              | 400 mg concurrent with 500 mg Calcium-Sandoz                                   | 2.29 | 2.50 | 13.70 | 32.20  | N/A  | 0.05 | 1.37 |      |

N/A: not available;  $C_{\max}$ : maximum plasma concentration;  $T_{\max}$ : time to maximum plasma concentration;  $t_{1/2}$ : half-life; AUC: area-under-the-curve of the concentration plasma profile;  $t_{1/2}$  calc.: calculated half-life;  $k_e$  calc.: elimination rate constant;  $k_a$  calc.: absorption rate constant. All calculated values generated using the methods outlined in Section 2.1 of the manuscript

**Table S2.** Fluoroquinolones PubChem compound identification numbers and SMILES strings.

| Fluoroquinolone | PubChem CID | SMILES                                                                           |
|-----------------|-------------|----------------------------------------------------------------------------------|
| Ciprofloxacin   | 2764        | <chem>C1CC1N2C=C(C(=O)C3=CC(=C(C=C3)N4CCNCC4F)C(=O)O</chem>                      |
| Enoxacin        | 3229        | <chem>CCN1C=C(C(=O)C2=CC(=C(N=C2)N3CCNCC3F)C(=O)O</chem>                         |
| Fleroxacin      | 3357        | <chem>CN1CCN(CC1)C2=C(C=C3C(=C2F)N(C=C(C3=O)C(=O)O)CCF)F</chem>                  |
| Lomefloxacin    | 3948        | <chem>CCN1C=C(C(=O)C2=CC(=C(C(=C2)F)N3CCNC(C3)C)F)C(=O)O</chem>                  |
| Norfloxacin     | 4539        | <chem>CCN1C=C(C(=O)C2=CC(=C(C=C2)N3CCNCC3F)C(=O)O</chem>                         |
| Ofloxacin       | 4583        | <chem>CC1COC2=C3N1C=C(C(=O)C3=CC(=C2N4CCN(CC4)C)F)C(=O)O</chem>                  |
| Pefloxacin      | 51081       | <chem>CCN1C=C(C(=O)C2=CC(=C(C=C2)N3CCN(CC3)C)F)C(=O)O</chem>                     |
| Rufloxacin      | 58258       | <chem>CN1CCN(CC1)C2=C(C=C3C4=C2SCCN4C=C(C3=O)C(=O)O)F</chem>                     |
| Sparfloxacin    | 60464       | <chem>C[C@@H]1CN(C[C@H](N1)C)C2=C(C(=C3C(=C2F)N(C=C(C3=O)C(=O)O)C4CC4)N)F</chem> |
| Tosufloxacin    | 5517        | <chem>C1CN(CC1N)C2=C(C=C3C(=O)C(=CN(C3=N2)C4=C(C=C(C=C4)F)F)C(=O)O)F</chem>      |
| Gatifloxacin    | 5379        | <chem>CC1CN(CC1N)C2=C(C=C3C(=C2OC)N(C=C(C3=O)C(=O)O)C4CC4)F</chem>               |

**Table S3.** All computed compound species and energies (PBE-D3BJ/6-31+G(d,p)/PCM=water).

| Compound                                                           | Computed energy (hartrees) |
|--------------------------------------------------------------------|----------------------------|
| Magnesium hexahydrate                                              | 658.0011708                |
| Calcium hexahydrate                                                | -1135.414984               |
| Aluminum hexahydrate                                               | -700.1485534               |
| Water dimer                                                        | -152.7241455               |
| Ciprofloxacin (N-protonated cation)                                | -1147.679747               |
| Ciprofloxacin (N-protonated cation) magnesium tetrahydrate complex | -1652.963524               |
| Ciprofloxacin (N-protonated cation) calcium tetrahydrate complex   | -2130.371626               |
| Ciprofloxacin (N-protonated cation) aluminum tetrahydrate complex  | -1695.128283               |
| Enoxacin (N-protonated cation)                                     | -1125.701515               |
| Enoxacin (N-protonated cation) aluminum tetrahydrate complex       | -1673.145694               |
| Fleroxacin (N-protonated cation)                                   | -1347.201465               |
| Fleroxacin (N-protonated cation) aluminum tetrahydrate complex     | -1894.641722               |
| Lomefloxacin (N-protonated cation)                                 | -1248.063014               |
| Lomefloxacin (N-protonated cation) aluminum tetrahydrate complex   | -1795.504464               |
| Norfloxacin (N-protonated cation)                                  | -1109.649136               |
| Norfloxacin (N-protonated cation) aluminum tetrahydrate complex    | -1657.097653               |
| Ofloxacin (N-protonated cation)                                    | -1262.129514               |
| Ofloxacin (N-protonated cation) aluminum tetrahydrate complex      | -1809.571226               |
| Pefloxacin (N-protonated cation)                                   | -1148.913311               |
| Pefloxacin (N-protonated cation) aluminum tetrahydrate complex     | -1696.358226               |
| Rufloxacin (N-protonated cation)                                   | -1545.728828               |
| Rufloxacin (N-protonated cation) aluminum tetrahydrate complex     | -2093.170767               |
| Sparfloxacin (N-protonated cation)                                 | -1380.671223               |
| Sparfloxacin (N-protonated cation) aluminum tetrahydrate complex   | -1928.112256               |
| Tosufloxacin (N-protonated cation)                                 | -1476.273000               |
| Tosufloxacin (N-protonated cation) aluminum tetrahydrate complex   | -2023.715423               |
| Gatifloxacin (N-protonated cation)                                 | -1301.341616               |
| Gatifloxacin (N-protonated cation) aluminum tetrahydrate complex   | -1848.786992               |

## References

- Frost, R.W.; Lasseeter, K.C.; Noe, A.J.; Shamblen, E.C.; Lettieri, J.T. Effects of aluminum hydroxide and calcium carbonate antacids on the bioavailability of ciprofloxacin. *Antimicrob. Agents Chemother.* **1992**, *36*, 830–832, doi:10.1128/aac.36.4.830.
- Shiba, K.; Sakamoto, M.; Nakazawa, Y.; Sakai, O. Effects of Antacid on Absorption and Excretion of New Quinolones. *Drugs* **1995**, *49*, 360–361, doi:10.2165/00003495-199500492-00098.
- Garrelts, J.C.; Godley, P.J.; Peterie, J.D.; Gerlach, E.H.; Yakshe, C.C. Sucralfate significantly reduces ciprofloxacin concentrations in serum. *Antimicrob. Agents Chemother.* **1990**, *34*, 931–933, doi:10.1128/aac.34.5.931.
- E Nix, D.; A Watson, W.; E Lener, M.; Frost, R.W.; Krol, G.; Goldstein, H.R.; Lettieri, J.T.; Schentag, J.J. Effects of aluminum and magnesium antacids and ranitidine on the absorption of ciprofloxacin. *Clin. Pharmacol. Ther.* **1989**, *46*, 700–705, doi:10.1038/clpt.1989.207.
- Sahai, J.; Gallicano, K.; Oliveras, L.; Khaliq, S.; Hawley-Foss, N.; Garber, G. Cations in the didanosine tablet reduce ciprofloxacin bioavailability. *Clin. Pharmacol. Ther.* **1993**, *53*, 292–297, doi:10.1038/clpt.1993.24.

16. Sahai, J.; Healy, D.P.; Stotka, J.; E Polk, R. The influence of chronic administration of calcium carbonate on the bioavailability of oral ciprofloxacin. *Br. J. Clin. Pharmacol.* **1993**, *35*, 302–304.
17. Grasela, T.H.; Schentag, J.J.; Sedman, A.J.; Wilton, J.H.; Thomas, D.J.; Schultz, R.W.; E Lebsack, M.; Kinkel, A.W. Inhibition of enoxacin absorption by antacids or ranitidine. *Antimicrob. Agents Chemother.* **1989**, *33*, 615–617, doi:10.1128/aac.33.5.615.
18. Lubowski, T.J.; Nightingale, C.H.; Sweeney, K.; Quintiliani, R. Effect of sucralfate on pharmacokinetics of fleroxacin in healthy volunteers. *Antimicrob. Agents Chemother.* **1992**, *36*, 2758–2760, doi:10.1128/aac.36.12.2758.
20. Shimada, J.; Shiba, K.; Oguma, T.; Miwa, H.; Yoshimura, Y.; Nishikawa, T.; Okabayashi, Y.; Kitagawa, T.; Yamamoto, S. Effect of antacid on absorption of the quinolone lomefloxacin. *Antimicrob. Agents Chemother.* **1992**, *36*, 1219–1224, doi:10.1128/aac.36.6.1219.
21. Lehto, P.; Kivisto, K.T. Effect of sucralfate on absorption of norfloxacin and ofloxacin. *Antimicrob. Agents Chemother.* **1994**, *38*, 248–251, doi:10.1128/aac.38.2.248.
24. Nix, D.; Wilton, J.H.; Ronald, B.; Distlerath, L.; Williams, V.C.; Norman, A. Inhibition of norfloxacin absorption by antacids. *Antimicrob. Agents Chemother.* **1990**, *34*, 432–435, doi:10.1128/aac.34.3.432.
71. Jaehde, U.; Sörgel, F.; Stephan, U.; Schunack, W. Effect of an antacid containing magnesium and aluminum on absorption, metabolism, and mechanism of renal elimination of pefloxacin in humans. *Antimicrob. Agents Chemother.* **1994**, *38*, 1129–1133, doi:10.1128/aac.38.5.1129.
72. Lazzaroni, M.; Imbimbo, B.P.; Bargiggia, S.; Sangaletti, O.; Bo, L.D.; Broccali, G.; Porro, G.B. Effects of magnesium-aluminum hydroxide antacid on absorption of rufloxacin. *Antimicrob. Agents Chemother.* **1993**, *37*, 2212–2216, doi:10.1128/aac.37.10.2212.
73. Lober, S.; Ziege, S.; Rau, M.; Schreiber, G.; Mignot, A.; Koeppe, P.; Lode, H. Pharmacokinetics of Gatifloxacin and Interaction with an Antacid Containing Aluminum and Magnesium. *Antimicrob. Agents Chemother.* **1999**, *43*, 1067–1071, doi:10.1128/aac.43.5.1067.
74. Stass, H.; Schühly, U.; Möller, J.-G.; Delesen, H. Effects of Sucralfate on the Oral Bioavailability of Moxifloxacin, a Novel 8-Methoxyfluoroquinolone, in Healthy Volunteers. *Clin. Pharmacokinet.* **2001**, *40*, 49–55, doi:10.2165/00003088-200140001-00007.
75. Stass, H.; Wandel, C.; Delesen, H.; Möller, J.-G. Effect of Calcium Supplements on the Oral Bioavailability of Moxifloxacin in Healthy Male Volunteers. *Clin. Pharmacokinet.* **2001**, *40*, 27–32, doi:10.2165/00003088-200140001-00004.
